# Supplementary material for: Spread of a Novel Influenza A (H1N1) Virus via Global Airline Transportation
Source: Atypon-hosted journal article supplement (doi:10.1056/nejmc0904559), 2009-06-29

## Supplementary Appendix

This appendix has been provided by the authors to give readers additional information about their work.

Supplement to: Khan K, Arino J, Hu W, et al. Spread of a novel influenza A (H1N1) virus via global airline transportation. *N Engl J Med* 2009;361:212-4. DOI: 10.1056/NEJMc0904559.

Supplementary Appendix (Table 1): Top Fifty Destination Cities for International Travelers Departing Mexico between March 1<sup>st</sup> and April 30<sup>th</sup> 2008

| <b>International Rank</b> | <b>Country Name</b> | <b>City Name</b>    | <b>Total Passenger Arrivals from Mexico</b> | <b>% of Total Passenger Departures from Mexico</b> | <b>Cumulative % of Total Passenger Departures from Mexico</b> |
|---------------------------|---------------------|---------------------|---------------------------------------------|----------------------------------------------------|---------------------------------------------------------------|
| 1                         | USA                 | Los Angeles         | 221,494                                     | 9.4%                                               | 9.4%                                                          |
| 2                         | USA                 | New York City       | 126,345                                     | 5.4%                                               | 14.8%                                                         |
| 3                         | USA                 | Chicago             | 111,531                                     | 4.8%                                               | 19.6%                                                         |
| 4                         | USA                 | Miami               | 81,074                                      | 3.5%                                               | 23.0%                                                         |
| 5                         | USA                 | Houston             | 70,776                                      | 3.0%                                               | 26.1%                                                         |
| 6                         | USA                 | Minneapolis/St Paul | 64,495                                      | 2.7%                                               | 28.8%                                                         |
| 7                         | USA                 | San Francisco       | 59,733                                      | 2.5%                                               | 31.4%                                                         |
| 8                         | USA                 | Detroit             | 54,299                                      | 2.3%                                               | 33.7%                                                         |
| 9                         | USA                 | Denver              | 49,304                                      | 2.1%                                               | 35.8%                                                         |
| 10                        | USA                 | Dallas/Fort Worth   | 48,383                                      | 2.1%                                               | 37.8%                                                         |

|    |           |              |        |      |       |
|----|-----------|--------------|--------|------|-------|
| 11 | USA       | Seattle      | 46,671 | 2.0% | 39.8% |
| 12 | Canada    | Toronto      | 44,854 | 1.9% | 41.7% |
| 13 | USA       | Phoenix      | 40,624 | 1.7% | 43.5% |
| 14 | USA       | Las Vegas    | 39,586 | 1.7% | 45.2% |
| 15 | France    | Paris        | 37,922 | 1.6% | 46.8% |
| 16 | Canada    | Vancouver    | 34,013 | 1.5% | 48.2% |
| 17 | USA       | Philadelphia | 30,746 | 1.3% | 49.5% |
| 18 | Cuba      | Havana       | 28,867 | 1.2% | 50.8% |
| 19 | Spain     | Madrid       | 27,532 | 1.2% | 51.9% |
| 20 | USA       | Atlanta      | 26,880 | 1.1% | 53.1% |
| 21 | USA       | Washington   | 26,043 | 1.1% | 54.2% |
| 22 | Argentina | Buenos Aires | 26,002 | 1.1% | 55.3% |
| 23 | Canada    | Montreal     | 25,863 | 1.1% | 56.4% |
| 24 | USA       | Boston       | 25,612 | 1.1% | 57.5% |
| 25 | USA       | Orlando      | 24,379 | 1.0% | 58.5% |

|    |               |                |        |      |       |
|----|---------------|----------------|--------|------|-------|
| 26 | USA           | Portland       | 24,120 | 1.0% | 59.6% |
| 27 | USA           | San Diego      | 20,999 | 0.9% | 60.5% |
| 28 | USA           | Salt Lake City | 20,415 | 0.9% | 61.3% |
| 29 | Guatemala     | Guatemala City | 18,985 | 0.8% | 62.1% |
| 30 | USA           | San Antonio    | 18,620 | 0.8% | 62.9% |
| 31 | USA           | Charlotte      | 18,198 | 0.8% | 63.7% |
| 32 | Brazil        | Sao Paulo      | 17,642 | 0.8% | 64.5% |
| 33 | USA           | San Jose       | 17,634 | 0.8% | 65.2% |
| 34 | USA           | Sacramento     | 16,316 | 0.7% | 65.9% |
| 35 | Canada        | Calgary        | 15,826 | 0.7% | 66.6% |
| 36 | Great Britain | London         | 15,449 | 0.7% | 67.2% |
| 37 | USA           | St Louis       | 14,614 | 0.6% | 67.9% |
| 38 | Germany       | Frankfurt      | 14,493 | 0.6% | 68.5% |
| 39 | USA           | Baltimore      | 13,395 | 0.6% | 69.1% |
| 40 | USA           | Oakland        | 13,308 | 0.6% | 69.6% |

|    |            |                 |        |      |       |
|----|------------|-----------------|--------|------|-------|
| 41 | USA        | Cleveland       | 13,207 | 0.6% | 70.2% |
| 42 | USA        | Kansas City     | 13,122 | 0.6% | 70.7% |
| 43 | USA        | Fort Lauderdale | 11,843 | 0.5% | 71.2% |
| 44 | Colombia   | Bogotá          | 11,593 | 0.5% | 71.7% |
| 45 | Panama     | Panama City     | 11,237 | 0.5% | 72.2% |
| 46 | Chile      | Santiago        | 11,225 | 0.5% | 72.7% |
| 47 | USA        | Indianapolis    | 11,059 | 0.5% | 73.2% |
| 48 | USA        | Memphis         | 11,051 | 0.5% | 73.6% |
| 49 | Costa Rica | San Jose        | 10,798 | 0.5% | 74.1% |
| 50 | Venezuela  | Caracas         | 10,694 | 0.5% | 74.6% |

Supplementary Appendix (Figure 1): Global Destinations of International Passengers Departing Mexico between March 1<sup>st</sup> and April 30<sup>th</sup>, 2007 and 2008

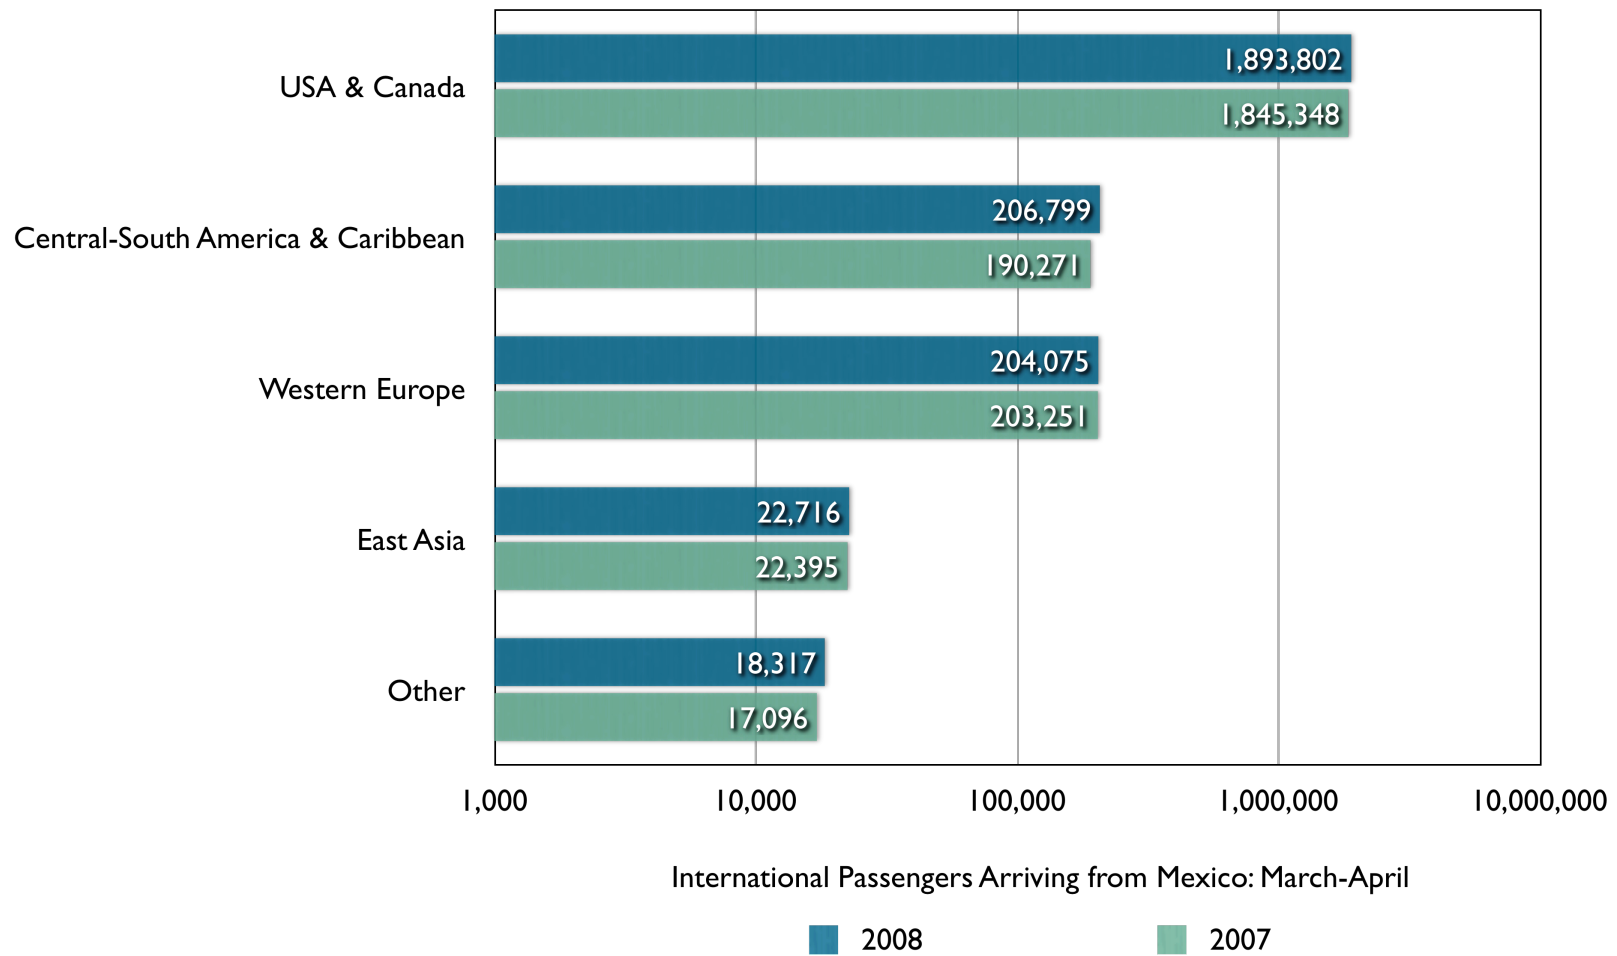

Supplementary Appendix (Figure 2): Receiver Operating Characteristic Curve of the Association between International Passenger Departures from Mexico to Countries of the World and Confirmed Importation of Influenza A H1N1 Associated with Travel to Mexico

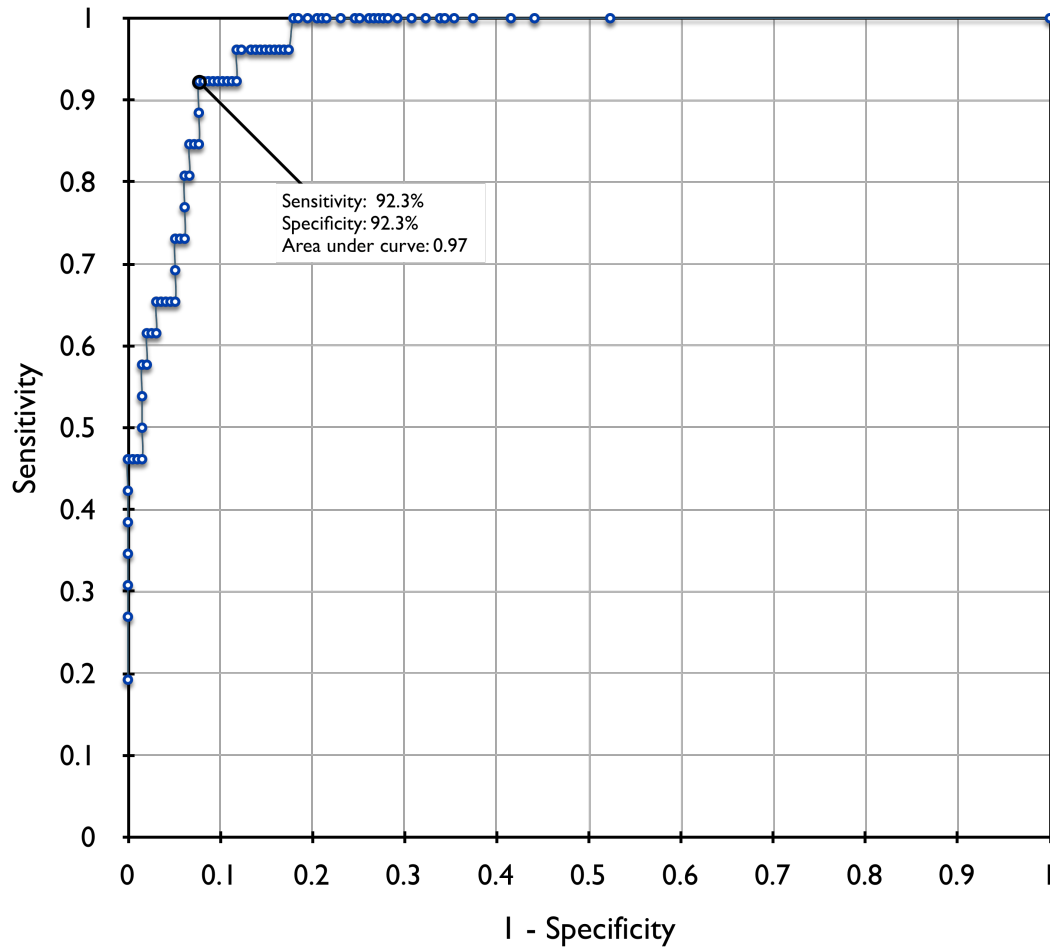

Supplement: nejm_khan_212sa1.pdf [file nejm_khan_212sa1.pdf]
